# Supplementary material for: Structural and functional analysis of RopB: a major virulence regulator in S treptococcus pyogenes
Source: PubMed Central journal article supplement — Mol Microbiol. 2016 Feb 19;99(6):1119–33. doi: 10.1111/mmi.13294 (PMC4794775; doi:10.1111/mmi.13294), 2016-02-19
Supplement: MMI-99-1119-s001.pdf [file MMI-99-1119-s001.pdf]

Supplementary figure S1

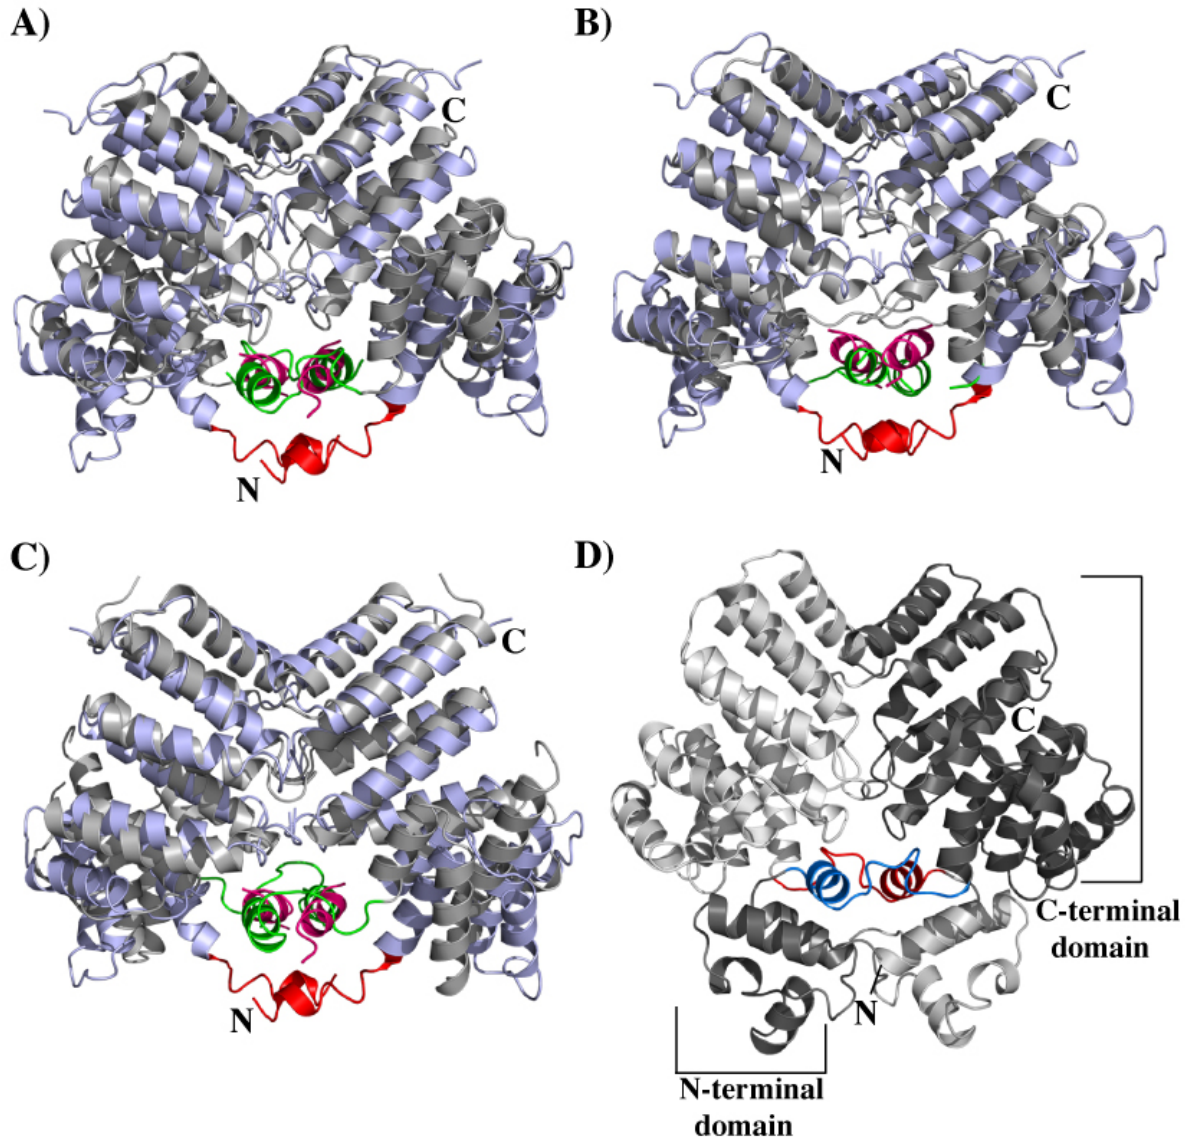

**Supplementary figure S1. Comparison of the relative position of the bridging helix  $\alpha 1$  ( $\alpha 4$  in full-length structures) between RopB-CTD and the full-length structures of RRNPP family regulators.** Superposition of RopB-CTD dimer (blue) with the analogous structural elements from PrgX (A) from *E. faecalis* (PDB code: 2AXZ), Rgg-like protein (B) from *L. monocytogenes* (PDB code: 4RYK), and Rgg2 (C) from *S. dysgalactiae* (PDB code: 4YV9). The dimeric structures of RopB structural homologs are colored in grey. The helix  $\alpha 1$  of RopB-CTD is colored in red, whereas the bridging helices of the structural homologs are colored in green. The helix  $\alpha 1$  from the symmetry mates in RopB crystal are shown and colored in pink. The N- and C-termini of RopB-CTD are marked as N and C, respectively. Structural superposition was performed with “LSQKAB”. D) The interdomain interactions between the bridging helix of one subunit and the C-terminal domain of the second subunit of a dimer, as observed in the full-length structure of PrgX from *E. faecalis* (PDB code: 2AXZ). Individual subunits of a PrgX

dimer is colored in light and dark grey and the N-terminal DNA-binding and C-terminal oligomerization/regulatory domain are labeled. The bridging helices of each subunit are color-coded (in blue and pink).

Supplementary figure S2

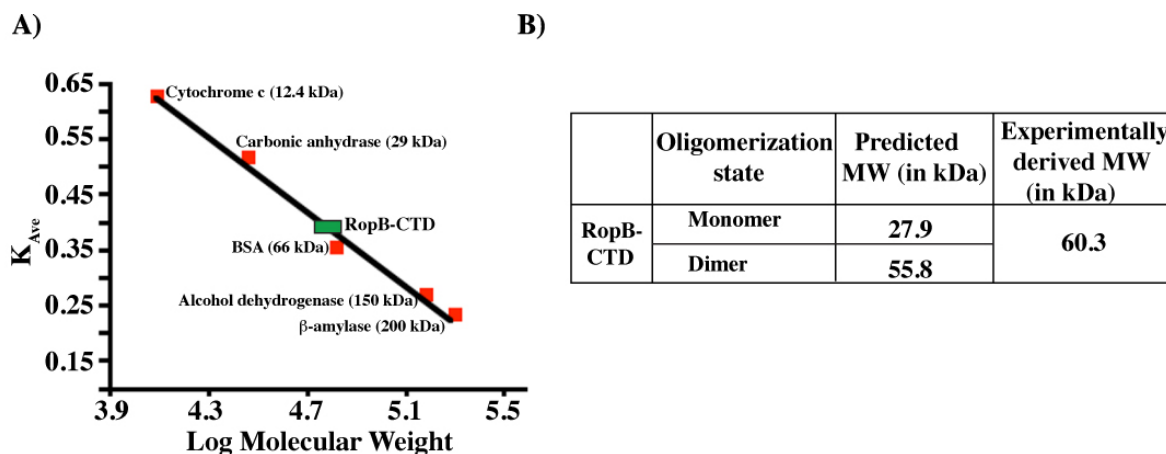

**Supplementary figure S2. Assessment of the oligomerization state of RopB-CTD in solution by size exclusion chromatography.** A) The linear fit of the elution volumes ( $K_{Ave}$ ) of five protein molecular weight standards, cytochrome c (12.4 kDa), carbonic anhydrase (29 kDa), bovine serum albumin (BSA, 66 kDa), alcohol dehydrogenase (150 kDa), and  $\beta$ -amylase (200 kDa), to their log molecular weight is shown as a black line on the graph. The elution volume ( $K_{Ave}$ ) of the purified RopB-CTD was plotted on the graph (green rectangle). B) RopB-CTD exists as a dimer in solution. The theoretical molecular weights of different oligomeric states of RopB-CTD were calculated based on their amino acid sequence, and the experimentally calculated molecular weight of RopB-CTD based on the elution profile in a superdex-200 size exclusion chromatography are shown.

Supplementary figure S3

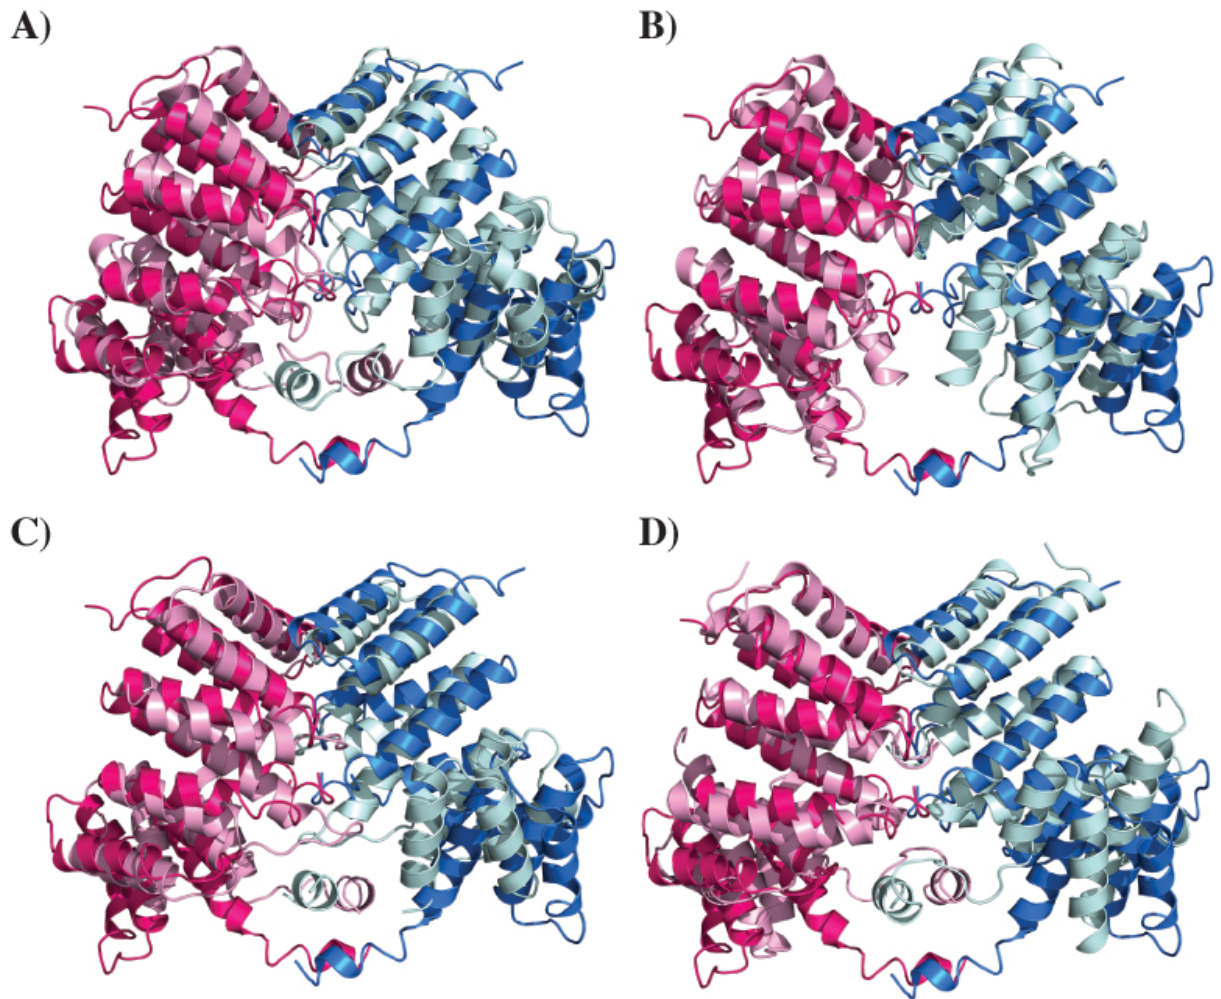

**Supplementary figure S3. Structural homology shared by RopB-CTD with the structurally characterized members of RRNPP family regulators.** Superposition of RopB-CTD dimer with the analogous structural elements from PrgX (A) from *E. faecalis* (PDB code: 2AXZ), PlcR (B) from *B. thuringiensis* (PDB code: 2QFC), Rgg2 (C) from *S. dysgalactiae* (PDB code: 4YV9) and Rgg-like protein (D) from *L. monocytogenes* (PDB code: 4RYK). Structural superposition was performed with “LSQKAB” program. Individual subunits of RopB-CTD dimer are colored in dark blue and pink, whereas the subunits of structural homologs are shaded in light blue and pink.

Supplementary figure S4

A)

|      |                                                                            |      |      |
|------|----------------------------------------------------------------------------|------|------|
| RopB | ---MEIGETVEFIRHSKNISIKQVCGDYLTRQTYRFFIKNNLDISSKLLYILDNLNVNV                | 57   |      |
| PrgX | MFKIGSVLKQIRQELNYHQIDLYSYGIMSKSVYIKVEADSRPISVEELSKFSEKRVNFFV               | 60   |      |
| PlcR | MQAEKLGSEIKKIRVLRGLTQKQVSENICHQSEVSRIESGAVYPSMDILQGIAAKLQIPI               | 60   |      |
|      | TPR1                                                                       |      |      |
| RopB | DEFLFISNNFKQYKEFIDMDTAKHYFECRN-IEGLNHILDSYKDSKSTKEKNLFALVKVL               | 116  |      |
| PrgX | ILNRAGMNTKSVNETGKEKLLISKIFTN-PDLFDKNFQRIEPKRLTSLQYFSIYLGYSI                | 119  |      |
| PlcR | IHFYEVLIVSDIERKKQFKDQVIMLCKQKRYKEIYNKVWVWELKKEEYHPEFQQFLOWQYY              | 120  |      |
|      | TPR2                                                                       | 152  | TPR3 |
| RopB | LATLT--EEDCLTERTYLSNYL-INIETWSHYETVLFN <sup>N</sup> CMF--ILESCFIEMVFSKVIV  | 171  |      |
| PrgX | AHHYNIEVPTFNKTTITSDLKHLVDKRTTFFGIDYEIVS <sup>N</sup> --LLNVLPEYEVSSIIKPMY- | 176  |      |
| PlcR | VAAVVLKKVDYEQVILELKLKLNQQLTGIDVYQONLYE <sup>N</sup> AIANIYAENGYLKKGIDLFEQ  | 180  |      |
|      | 192                                                                        | TPR4 |      |
| RopB | NLDKYNTL-RYYGNESIRMFV <sup>N</sup> MLILFIQRQYDKASEILAKIEDYQLND---DCLYERC   | 227  |      |
| PrgX | PIVDSFGKDY--DLTIQTVLKN <sup>N</sup> ALTISIMNRNLKEAQYYINQFEHLKTIKNISINGYYDL | 234  |      |
| PlcR | ILKQLEALHDNEEFDVKVRY-N <sup>H</sup> AKALYLDSTRYEEESLYQVNKAIEISCRIN-----    | 230  |      |
|      | TPR5                                                                       |      |      |
| RopB | CVSFFDGIIGLINGK-EGAEQKCVQILEIFQLLNCKTIHMHFQTYL--EAIKHKLS----               | 280  |      |
| PrgX | EINYLKQIYQFLTDKNIDSYLNAVNIINIFKIGKEDIHRSVLEELTKISAKEKFTPPKE                | 294  |      |
| PlcR | SMALIGQLYYQRGECLRKLEYEEAEIEDAYKKAS--FFFDILEMHAYKEALVNKISRL--               | 286  |      |
| RopB | -----                                                                      |      |      |
| PrgX | VTMYENYVAIENNPPIPEIKEQS                                                    | 317  |      |
| PlcR | -----                                                                      |      |      |

B)

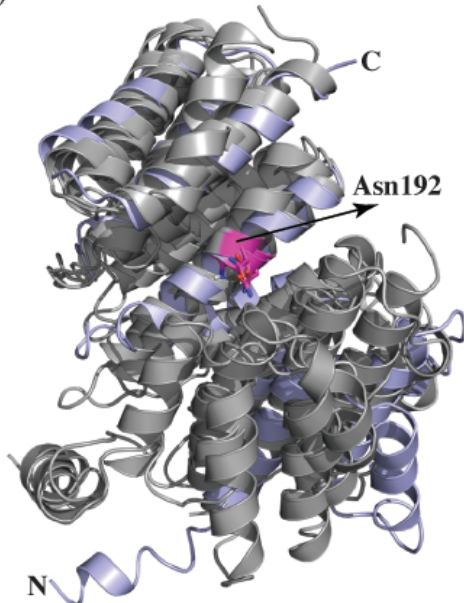

C)

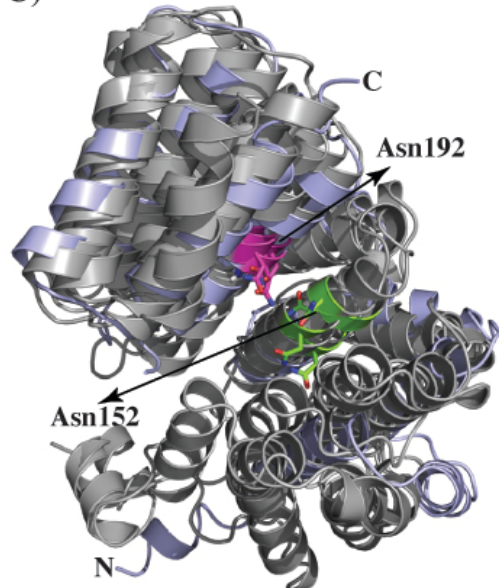

**Supplementary figure S4. Conserved asparagines in the ligand-binding pocket of structurally characterized members of RRRNP family regulators.** A) Amino acid sequence alignment of RopB, PlcR from *B. thuringiensis*, and PrgX from *E. faecalis*. The positions of TPR motifs derived from the RopB-CTD structure are indicated above the alignment. The conserved asparagines that interact with the cognate peptides in the co-crystal structures of peptide-bound PrgX and PlcR are boxed and marked in red. The alignment was carried out with ClustalW. Structural superposition of the C-terminal domain of RopB with the analogous residues from the

structures of PrgX (PDB code: 2AXZ), PlcR (PDB code: 2QFC), Rgg2 (PDB code: 4YV9), and Rgg-like protein from *L. monocytogenes* (PDB code: 4RYK). The location of the side chains of asparagines, Asn 192 (**B and C**) and Asn 152 (**C**) is highlighted in pink and green, respectively, and labeled. The side chains are displayed as ball and stick representation. The N- and C-termini of RopB-CTD are labeled as N and C, respectively. Structural superposition was performed with LSQKAB.

Supplementary figure S5

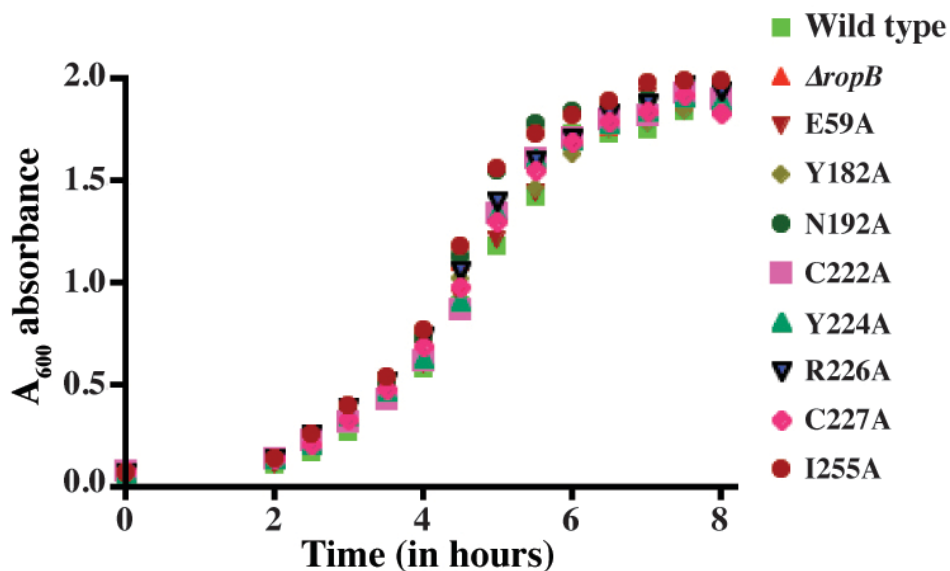

Supplementary figure S5. Growth curve of indicated strains in THY broth.

**Supplementary table S1.**

Selected crystallographic data and statistics.

| <b>Data Collection and Phasing</b>                 |                          |             |              |
|----------------------------------------------------|--------------------------|-------------|--------------|
| Dataset                                            | SeMet                    |             | Native       |
| Wavelength (l)                                     | 0.97971                  | 0.957       | 1.12         |
| Resolution (Å)                                     | 50.0 – 3.8               |             | 81.0 – 3.5   |
| $R_{\text{sym}}^a$                                 | 0.097 (0.5) <sup>b</sup> | 0.094 (0.5) | 0.070 (0.98) |
| I/s(I)                                             | 10.7 (3.7)               | 11.6 (3.9)  | 14.7 (2.2)   |
| Total Reflections (#)                              | 76335                    | 75984       | 61325        |
| Unique Reflections (#)                             | 9357                     | 9337        | 11346        |
| Completeness (%)                                   | 100 (99.9)               | 100 (99.9)  | 97.8 (95.3)  |
| Selenium sites                                     |                          |             |              |
| (identified/total no of sites)                     | 10/12                    |             |              |
| Overall Figure of Merit <sup>c</sup>               | 0.35                     |             |              |
| <b>Refinement Statistics</b>                       |                          |             |              |
| Resolution Range (Å)                               |                          |             | 81.0-3.5     |
| $R_{\text{work}}/R_{\text{free}}$ (%) <sup>d</sup> |                          |             | 27.6/31.3    |
| <b>Atoms (#)</b>                                   |                          |             |              |
| Protein                                            |                          |             | 3704         |
| B factors (Å <sup>2</sup> )                        |                          |             | 130.5        |
| <b>rmsd</b>                                        |                          |             |              |
| Bond lengths (Å)                                   |                          |             | 0.004        |
| Bond angles (°)                                    |                          |             | 0.865        |
| <b>Ramachandran analysis</b>                       |                          |             |              |
| Most favoured (%)                                  |                          |             | 96.33        |
| Add. allowed (%)                                   |                          |             | 3.67         |
| Gen. allowed (%)                                   |                          |             | 0.0          |
| Disallowed (%)                                     |                          |             | 0.0          |

<sup>a</sup> $R_{\text{sym}} = \sum \sum |I_{\text{hkl}} - I_{\text{hkl}(j)}| / \sum I_{\text{hkl}}$ , where  $I_{\text{hkl}(j)}$  is the observed intensity and  $I_{\text{hkl}}$  is the final average intensity value. <sup>b</sup>Values in parentheses are for the highest resolution shell. <sup>c</sup>Figure of Merit =  $\langle |SP(a)e^{ia}/SP(a)| \rangle$ , where  $a$  is the phase and  $P(a)$  is the phase probability distribution. <sup>d</sup> $R_{\text{work}} = \sum |F_{\text{obs}}| - |F_{\text{calc}}| / \sum |F_{\text{obs}}|$  and  $R_{\text{free}} = \sum |F_{\text{obs}}| - |F_{\text{calc}}| / \sum |F_{\text{obs}}|$ ; where all reflections belong to a test set of 5% randomly selected reflections.

**Supplementary table S2.** Bacterial strains and plasmids used in this study.

| Strain or plasmid              | Description                                                                                         | Reference |
|--------------------------------|-----------------------------------------------------------------------------------------------------|-----------|
| Strains                        |                                                                                                     |           |
| MGAS10870                      | Invasive isolate, serotype M3                                                                       | (1)       |
| MGAS10870 $\Delta$ <i>ropB</i> | MGAS10870 $\Delta$ <i>ropB::aad9</i>                                                                | (2)       |
| MGAS10870 $\Delta$ <i>speB</i> | MGAS10870 $\Delta$ <i>speB::aad9</i>                                                                | (4)       |
| Plasmids                       |                                                                                                     |           |
| pET21b                         | Overexpression vector for C-terminally hexahistidine tagged recombinant proteins                    |           |
| pJL                            | Low-copy number plasmid capable of replication in GAS and <i>Escherichia coli</i> , Cm <sup>+</sup> | (3)       |

**Supplementary table S3. Primers and probes used in this study**

| <b>Primer</b> | <b>Sequence 5'-3'</b>                       | <b>Application</b>                           |
|---------------|---------------------------------------------|----------------------------------------------|
| E59A Top      | TGTGAACGTTGAC <b>GCT</b> TTTTCTGTTTCATCAG   | Site directed mutagenesis to introduce E59A  |
| E59A Bottom   | CTGATGAACAGAAAAGCGTCAACGTTCAACA             | Site directed mutagenesis to introduce E59A  |
| Y182A Top     | AATACCCTAAGGTAT <b>GCT</b> GGGAATGAATCGATTC | Site directed mutagenesis to introduce Y182A |
| Y182A Bottom  | GAATCGATTCATTCCCAGCATACCTTAGGGTATT          | Site directed mutagenesis to introduce Y182A |
| N192A Top     | ATTCGGATGTTTGT <b>CGCT</b> ATGTTGATTTTG     | Site directed mutagenesis to introduce N192A |
| N192A Bottom  | CAAAATCAACATAGCGACAAACATCCGAAT              | Site directed mutagenesis to introduce N192A |
| C222A Top     | ATCAGCTAAATGATGAT <b>GCT</b> TTATATGAACGGTG | Site directed mutagenesis to introduce C222A |
| C222A Bottom  | CACCGTTCATATAAAGCATCATCTTAGCTGAT            | Site directed mutagenesis to introduce C222A |
| Y224A Top     | ATGATGATTGCTTAG <b>GCT</b> GAACGGTGTTGTG    | Site directed mutagenesis to introduce Y224A |
| Y224A Bottom  | CACAACACCGTTCAGCTAAGCAATCATCAT              | Site directed mutagenesis to introduce Y224A |
| R226A Top     | ATTGCTTATATGAA <b>GCT</b> TGTTGTGTGTCT      | Site directed mutagenesis to introduce R226A |
| R226A Bottom  | AGACACACAACAAGCTTCATATAAGCAAT               | Site directed mutagenesis to introduce R226A |
| C227A Top     | TGCTTATATGAACGG <b>GCT</b> TGTGTGTCTTTTTTTG | Site directed mutagenesis to introduce C227A |
| C227A Bottom  | CAAAAAAAGACACACAAGCCCGTTCATATAAGCA          | Site directed mutagenesis to introduce C227A |
| I255A Top     | TTCAAATTCTGGA <b>GCCT</b> TTTCAGCTGCTG      | Site directed mutagenesis to                 |



|                    |                               |                                              |
|--------------------|-------------------------------|----------------------------------------------|
|                    |                               | introduce I255A                              |
| I255A Bottom       | CAGCAGCTGAAAGGCTTCCAGAATTTGAA | Site directed mutagenesis to introduce I255A |
| <i>tufA</i> qRTFwd | CAACTCGTCACTATGCGCACAT        | qRT-PCR analysis of <i>tufA</i>              |
| <i>tufA</i> qRTRev | GAGCGGCACCAGTGATCAT           | qRT-PCR analysis of <i>tufA</i>              |
| <i>tufA</i> probe  | CTCCAGGACACGCGGACTACGTТААААА  | qRT-PCR analysis of <i>tufA</i>              |
| <i>speB</i> qRTFwd | CAACTCGTCACTATGCGCACAT        | qRT-PCR analysis of <i>speB</i>              |
| <i>speB</i> qRTRev | GAGCGGCACCAGTGATCAT           | qRT-PCR analysis of <i>speB</i>              |
| <i>speB</i> probe  | CTCCAGGACACGCGGACTACGTТААААА  | qRT-PCR analysis of <i>speB</i>              |
| <i>ropB</i> qRTFwd | CAACTCGTCACTATGCGCACAT        | qRT-PCR analysis of <i>ropB</i>              |
| <i>ropB</i> qRTRev | GAGCGGCACCAGTGATCAT           | qRT-PCR analysis of <i>ropB</i>              |
| <i>ropB</i> probe  | CTCCAGGACACGCGGACTACGTТААААА  | qRT-PCR analysis of <i>ropB</i>              |

1. **Beres, S. B., R. K. Carroll, P. R. Shea, I. Sitkiewicz, J. C. Martinez-Gutierrez, D. E. Low, A. McGeer, B. M. Willey, K. Green, and G. J. Tyrrell.** 2010. Molecular complexity of successive bacterial epidemics deconvoluted by comparative pathogenomics. *Proc. Natl. Acad. Sci. USA* **107**:4371-4376.
2. **Carroll, R. K., S. A. Shelburne III, R. J. Olsen, B. Suber, P. Sahasrabhojane, M. Kumaraswami, S. B. Beres, P. R. Shea, A. R. Flores, and J. M. Musser.** 2011. Naturally occurring single amino acid replacements in a regulatory protein alter streptococcal gene expression and virulence in mice. *J. Clin. Invest.* **121**:1956-1968.
3. **Li, J., D. L. Kasper, F. M. Ausubel, B. Rosner, and J. L. Michel.** 1997. Inactivation of the  $\alpha$  C protein antigen gene, *bca*, by a novel shuttle/suicide vector results in attenuation of virulence and immunity in group B *Streptococcus*. *Proc. Natl. Acad. Sci. USA* **94**:13251-13256.
4. **Shelburne III, S. A., R. J. Olsen, N. Makthal, N. G. Brown, P. Sahasrabhojane, E. M. Watkins, T. Palzkill, J. M. Musser, and M. Kumaraswami.** 2011. An amino-terminal signal peptide of Vfr protein negatively influences RopB-dependent SpeB expression and attenuates virulence in *Streptococcus pyogenes*. *Mol. Microbiol.* **82**:1481-1495.
